# Supplementary material
Source: PubMed Central journal article supplement (PMC2735349)
Supplement: NIHMS103359-supplement-1_si_001.pdf [file NIHMS103359-supplement-1_si_001.pdf]

## Hairpin structure of a biarsenal –tetracysteine motif determined by NMR

*Fatemeh Madani<sup>†</sup>, Jesper Lind<sup>†</sup>, Peter Damberg<sup>†</sup>, Stephen R. Adams<sup>‡</sup>, Roger Y. Tsien<sup>‡,\*</sup> and Astrid O. Gräslund<sup>†,\*</sup>*

Department of Biochemistry and Biophysics, Arrhenius Laboratories, Stockholm University, SE-106 91 Stockholm, Sweden, and Howard Hughes Medical Institute, University of California, San Diego, 9500 Gilman Dr., La Jolla, CA 92093-0647, USA.

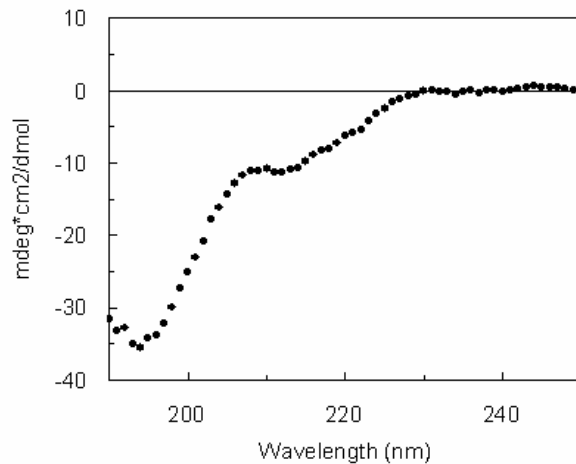

**Figure S1:** CD spectrum recorded at 277K for 6  $\mu$ M concentration of the peptide bound to the ReAsH, pH 7.4. The CD spectrum was recorded with 0.05 mm optical pathway and was baseline corrected using a buffer solution.

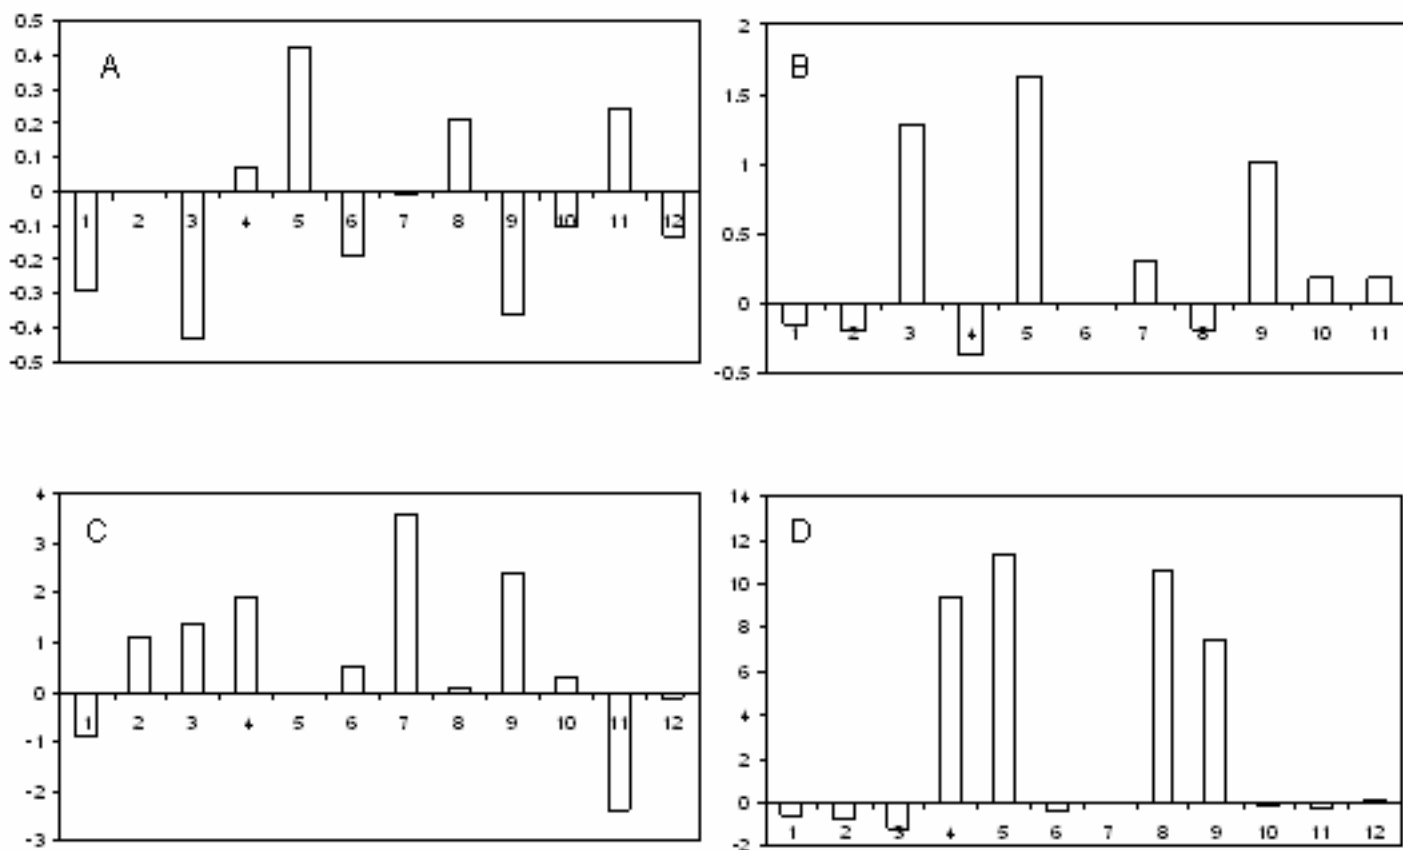

**Figure S2:** Secondary chemical shifts (ppm) for proton and carbon resonances against residue number were calculated according to the method of Wishart and Sykes<sup>1</sup>. (A)  $H^\alpha$  secondary chemical shifts (B)  $H^N$  secondary chemical shifts (C)  $C^\alpha$  secondary chemical shifts and (D)  $C^\beta$  secondary chemical shifts.

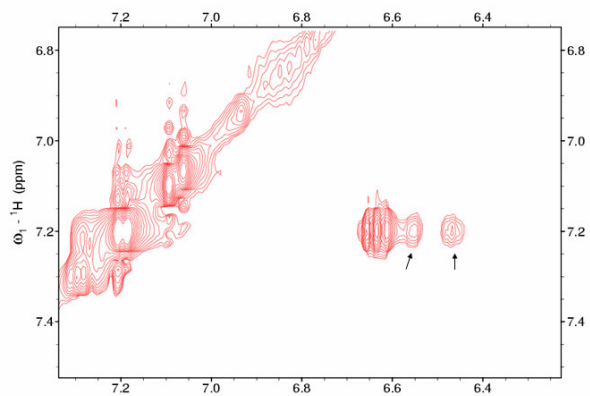

**Figure S3.** Partial 500 MHz NOESY spectrum with the mixing time of 300 ms. Arrows show the crosspeaks between the 16(12) proton of ReAsH and aromatic protons of F1.

**Table S1:** Observed chemical shifts (ppm) for the 12-residue peptide FLNCCPGCCMEP bound to the ReAsH.

| Residue           | H <sup>N</sup>               | H <sup>α</sup>  | H <sup>β</sup>   | H <sup>γ</sup>   | H <sup>δ</sup> | H <sup>ε</sup> | H <sup>ζ</sup> | C <sup>α</sup> | C <sup>β</sup> | C <sup>γ</sup>   | C <sup>δ</sup> | C <sup>ε</sup> | C <sup>ζ</sup> |
|-------------------|------------------------------|-----------------|------------------|------------------|----------------|----------------|----------------|----------------|----------------|------------------|----------------|----------------|----------------|
| Phe1              | 8.15                         | 4.34            | 3.25 2.74        | -                | 6.47           | 6.55           | 6.55           | 56.8           | 39.0           | -                | 129.8          | 130.7          | 129.8          |
| Leu2              | 8.03                         | 4.32            | 1.56<br>1.46     | 1.51             | 0.81<br>0.85   | -              | -              | 56.2           | 41.6           | 27.0             | 24.2           | -              | -              |
| Asn3              | 9.66                         | 4.31            | 2.89<br>2.76     | -                | 7.79<br>7.09   | -              | -              | 54.5           | 37.7           | -                | -              | -              | -              |
| Cys4              | 7.86                         | 4.61            | 3.17<br>3.17     | -                | -              | -              | -              | 60.1           | 37.4           | -                | -              | -              | -              |
| Cys5              | 9.85                         | 4.96            | 3.31<br>3.07     | -                | -              | -              | -              | -              | 39.4           | -                | -              | -              | -              |
| Pro6              | -                            | 4.23            | 2.24<br>1.86     | 1.96<br>2.10     | 3.79<br>3.66   | -              | -              | 63.8           | 31.7           | 34.7             | 50.7           | -              | -              |
| Gly7              | 8.60                         | 4.11<br>3.80    | -                | -                | -              | -              | -              | 45.7           | -              | -                | -              | -              | -              |
| Cys8              | 8.04                         | 4.75            | 2.89<br>3.07     | -                | -              | -              | -              | 58.3           | 38.6           | -                | -              | -              | -              |
| Cys9              | 9.25                         | 4.18            | 3.41<br>3.46     | -                | -              | -              | -              | 60.6           | 35.4           | -                | -              | -              | -              |
| Met10             | 8.47                         | 4.38            | 1.96<br>2.07     | 2.42<br>2.42     | -              | 2.05           | -              | 55.7           | 32.7           | 31.9             | -              | 16.4           | -              |
| Glu11             | 8.54                         | 4.57            | 1.92<br>2.03     | 2.21<br>2.41     | -              | -              | -              | 54.2           | 29.6           | 35.9             | -              | -              | -              |
| Pro12             | -                            | 4.29            | 2.25<br>1.89     | n.d <sup>a</sup> | 3.66<br>3.79   | -              | -              | 63.2           | 32.2           | n.d <sup>a</sup> | 50.7           | -              | -              |
| ReAsH             | H15/H11 <sup>b</sup><br>6.64 | H16/H12<br>7.20 | C15/C11<br>131.7 | C16/C12<br>129.2 |                |                |                |                |                |                  |                |                |                |
| Succinyl<br>group | (H1)<br>2.10                 | (H2)<br>1.98    | (C1)<br>27.5     | (C2)<br>27.3     |                |                |                |                |                |                  |                |                |                |

<sup>a</sup>not determined.

<sup>b</sup>the resorufin resonances are degenerate due to the symmetry of the molecule, which was not broken by its asymmetric environment.

## Materials and Methods

**ReAsH-tetracysteine complexes.** Peptides were synthesized by standard Fmoc solid-phase techniques using a Pioneer (Perseptive Biosciences) or a Symphony peptide synthesizer (Protein Technologies, Inc). TGR-resin (Novagen) bound-peptides were acylated on the N-terminus by reaction with 5 equivalents of NHS-PEG<sup>TM</sup> (MW=245, 333, 509 or 685; Quanta BioDesign Ltd), or 50 equivalents of succinic anhydride or chlorosulfonic acid in DMF containing excess DIEA. Peptide was cleaved from the support with TFA-EDT-triisopropylsilane-H<sub>2</sub>O and precipitated with cold ether-hexanes. Crude peptide was reacted with excess ReAsH-EDT<sub>2</sub> in DMSO containing 4-methylmorpholine for at least 1 hr at room temperature before purification and analysis by LC-MS (Agilent 1100 with Ion trap) on C18 columns (analytical or semi-prep; Phenomenex) with acetonitrile-H<sub>2</sub>O-0.05% TFA gradient and lyophilization. For NMR, the ReAsH-tetracysteine complex was dissolved in a minimum of 50 mM potassium phosphate pH 7.2, filtered (0.2  $\mu$ m centrifugal; Corning) and concentration determined by dilution in 0.1N NaOH ( $\epsilon_{578} = 63000 \text{ M}^{-1}\text{cm}^{-1}$ ).

**Absorbance, fluorescence and stability to dithiol of ReAsH-tetracysteine complexes.** Purified ReAsH-tetracysteine stock solutions were in 50% aqueous acetonitrile containing 0.05% TFA. Extinction coefficients were determined in 10 mM K.MOPS pH 7.2 by comparison with the subsequent absorbance at 578.5 nm on adding 1N-NaOH to give a final concentration of 0.1N<sup>2</sup>. The extinction coefficient of ReAsH-EDT<sub>2</sub> in 0.1N NaOH is 63000 M<sup>-1</sup>cm<sup>-1</sup>.

Fluorescence spectra were measured in 100 mM KMOPS pH 7.2 using a Fluorolog (Horiba Jovin Yvon) fluorimeter. Rhodamine 101 in EtOH was used as a standard ( $\phi = 1.0$ )<sup>3</sup> to determine fluorescent quantum yield. Relative stabilities of the ReAsH-tetracysteine complexes were measured by following the decrease in fluorescence (excitation 590 nm emission 610 nm) on adding 0.5 mM EDT (stock freshly prepared in DMSO) to the complex in 5 mM 2-mercaptoethanesulfonate 100 mM KMOPS pH 7.2. Apparent rate constants were determined by fitting to a single or double exponential.

**Circular dichroism.** Circular Dichroism spectra were recorded on a JASCO J-720 CD spectrometer at 277K. Wavelengths between 190 nm and 220 nm were recorded, using a bandwidth of 0.2 nm. A quartz cuvette with an optical path length of 0.05 mm was used, requiring approximately 100  $\mu$ l of sample. 5  $\mu$ l of the sample was diluted to a concentration of 6  $\mu$ M for the CD experiment. The background signal was subtracted from the peptide spectrum.

**NMR experiments.** All NMR experiments were carried out at a temperature of 278K on a Bruker Avance spectrometer equipped with a cryoprobe and operating at a Larmor frequency of 500 MHz, a Varian Inova NMR spectrometer equipped with a triple resonance probe head operating at a Larmor frequency of 600 MHz and a Bruker Avance spectrometer equipped with a double resonance probe head operating at a Larmor frequency of 400 MHz.

NOESY spectra<sup>4</sup>, TOCSY spectra<sup>5</sup> and DQF-COSY spectra<sup>6</sup> were recorded at proton frequencies of 500 and 600 MHz. The NOESY spectra were performed with a mixing time of 150 - 500 ms while the TOCSY spectra used 20, 30, 60 and 80 ms. Data were typically collected as 2048 $\times$ 512 data point matrices with 32-64 scans. In order to simplify the assignment and find the resonances of the four hydrogen atoms of ReAsH, a natural abundance carbon filtered HSQC was recorded on the sample. The water signal was suppressed with the WATERGATE or excitation sculpting methods<sup>7, 8</sup>. Diffusion coefficients were measured using the pulse field gradient spin echo experiment (PFG-LED)<sup>9</sup> with a fixed diffusion time and a pulsed field gradient increasing linearly over 32 steps. A measured diffusion coefficient could be related to a molecular weight via the Stokes-Einstein relationship according to a scaling law calibrated for unstructured peptides<sup>10</sup>.

**Structure calculation.** The spectra were processed with NMRpipe<sup>11</sup> and the processing included zero-filling to 4096 $\times$ 2048 data points and multiplication of a shifted sine bell function prior to Fourier transformation. 2D-spectral analysis, peak picking and crosspeak integration were performed in Sparky 3.113<sup>12</sup>. CYANA 2.0<sup>13, 14</sup> was used to convert the intensity of the NOESY crosspeaks into upper distances constrains.

## References

- (1) Wishart, D. S.; Sykes, B. D. *Meth. Enzymol.* **1994**, *239*, 363-392.
- (2) Adams, S.R.; Tsien, R. Y. *Nature protocols.* **2008**, *3*, 1527-1534.
- (3) Karstens, T.; Kobs, K. *J. Phys. Chem.* **1980**, *84*, 1871-1872
- (4) Jeener, J.; Meier, B. H.; Bachmann, P.; Ernst, R. R. *J. Chem. Phys.* **1979**, *71*, 4546-4553.
- (5) Braunschweiler, L.; Ernst, R. R. *J. Magn. Reson.* **1983**, *53*, 521-528.
- (6) Rance, M.; Sørensen, O. W.; Bodenhausen, G.; Wagner, G.; Ernst, R.R.; Wüthrich, K. *Biochem. Biophys. Res. Commun.* **1983**, *117*, 479-485.
- (7) Piotto, M.; Saudek, V.; Sklenář, V. *J. Biomol. NMR.* **1992**, *2*, 661-665.
- (8) Hwang, T. L.; Shaka, A. J. *J. Magn. Reson.* **1995**, *112*, 275-279.
- (9) Gibbs, S. J.; Johnson, C. S. *J. Magn. Reson.* **1991**, *93*, 395-402.
- (10) Danielsson, J.; Jarvet, J.; Damberg, P.; Gräslund, A. *Magn. Reson. Chem.* **2002**, *40*, 89-97.
- (11) Delaglio, F.; Grzesiek, S.; Vuister, G. W.; Zhu, G.; Pfeifer, J.; Bax, A. *J. Biomol. NMR.* **1995**, *6*, 277-293.
- (12) Goddard, T. D.; Kneller, D. G. SPARKY 3; University of California, San Francisco.
- (13) Güntert, P.; Mumenthaler, C.; Wüthrich, K. *J. Mol. Biol.* **1997**, *273*, 283-298.
- (14) Güntert, P. *Methods Mol. Biol.* **2004**, *278*, 353-378.
